# Supplementary material for: Performance evaluation of the automated body fluid analysis of the new Sysmex XR haematology analyser
Source: publisher site journal article supplement (doi:10.1515/labmed-2023-0064), 2023-11-10
Supplement: Supplementary file 1 [file j_labmed-2023-0064_suppl_003.docx]

**Supplementary Table 3**. Correlation of WBC-related parameters from XN and XR based on the presence or absence of WBC abnormal scattergram flags on one or both analysers

|  |  | | **Spearman Coefficient** | **Slope** | **Mean difference** |
| --- | --- | --- | --- | --- | --- |
| **Diagnostic parameters** | **WBC-BF** | No flags | 0.996 | 0.94 | 0.07 |
| Both have flags | 0.988 | 1.00 | -0.06 |
| Discordant | 0.988 | 0.98 | 0.07 |
| **MN#** | No flags | 0.994 | 0.96 | 0.04 |
| Both have flags | 0.994 | 1.03 | -0.02 |
| Discordant | 0.986 | 0.92 | 0.04 |
| **PMN#** | No flags | 0.982 | 0.92 | 0.03 |
| Both have flags | 0.994 | 1.01 | -0.04 |
| Discordant | 0.996 | 0.98 | 0.03 |
| **TC-BF** | No flags | 0.994 | 0.94 | 0.07 |
| Both have flags | 0.983 | 1.00 | -0.06 |
| Discordant | 0.988 | 0.98 | 0.07 |
| **Research parameters** | **LY-BF** | No flags | 0.995 | 0.97 | 0.03 |
| Both have flags | 0.980 | 0.93 | 0.01 |
| Discordant | 0.986 | 0.83 | 0.05 |
| **MO-BF** | No flags | 0.980 | 0.93 | 0.01 |
| Both have flags | 0.990 | 1.16 | -0.02 |
| Discordant | 0.974 | 1.06 | -0.01 |
| **NE-BF** | No flags | 0.994 | 0.96 | 0.03 |
| Both have flags | 0.994 | 1.03 | -0.09 |
| Discordant | 0.986 | 0.92 | 0.03 |
| **EO-BF** | No flags | 0.881 | 1.00 | 0.00 |
| Both have flags | 0.976 | 0.69 | 0.05 |
| Discordant | 0.770 | 0.75 | 0.01 |
| **HF-BF** | No flags | 0.960 | 0.90 | 0.00 |
| Both have flags | 0.900 | 1.05 | 0.00 |
| Discordant | 0.858 | 0.75 | 0.00 |

No flags (n=278); Both have flags (n=17); Discordant (n=15).

WBC-BF, white blood cell count in body fluid (BF) mode; RBC-BF, red blood cell count in BF mode; MN#, mononuclear cell count in BF mode; PMN#, polymorphonuclear cell count in BF mode; TC-BF, total nucleated count in BF mode; NE-BF#, neutrophil cell count in BF mode; LY-BF#, lymphocyte cell count in BF mode; MO-BF#, monocyte cell count in BF mode; EO-BF#, eosinophil cell count in BF mode; HF-BF#, high fluorescent cell count in BF mode.
